# Supplementary material
Source: PubMed Central journal article supplement (PMC5502112)
Supplement: NIHMS864455-supplement.pdf [file NIHMS864455-supplement.pdf]

**Table S1.** Intermolecular hydrogen-bonds and hydrophobic contacts between quinacrine and Kir4.1 channels.

| Quinacrine |      | Kir4.1                      |      |              |
|------------|------|-----------------------------|------|--------------|
|            |      | <i>Hydrogen-bonds</i>       |      |              |
| Donor      | Atom | Acceptor                    | Atom | Distance (Å) |
| Qn         | N3   | GLU158 (A)                  | OE2  | 3.38         |
| Qn         | N4   | THR128 (D)                  | OG1  | 3.28         |
| Qn         | N4   | THR127 (D)                  | O    | 3.18         |
| Qn         | N5   | GLU158 (B)                  | OE2  | 2.79         |
|            |      | <i>Hydrophobic contacts</i> |      |              |
| Donor      | Atom | Acceptor                    | Atom | Distance (Å) |
| Qn         | C7   | GLU158 (D)                  | CD   | 3.60         |
| Qn         | C6   | GLU158 (D)                  | CD   | 3.29         |
| Qn         | C21  | GLU158 (D)                  | CD   | 3.57         |
| Qn         | C15  | GLU158 (D)                  | CD   | 3.72         |
| Qn         | C8   | THR154 (D)                  | CG2  | 3.74         |
| Qn         | C7   | THR154 (D)                  | CG2  | 3.83         |
| Qn         | C8   | THR128 (D)                  | CG2  | 3.52         |
| Qn         | C7   | THR128 (D)                  | CG2  | 3.77         |
| Qn         | C26  | THR127 (D)                  | CA   | 3.83         |
| Qn         | C21  | THR127 (D)                  | CA   | 3.72         |
| Qn         | C25  | GLU158 (B)                  | CD   | 3.61         |
| Qn         | C22  | GLU158 (B)                  | CD   | 3.93         |
| Qn         | C16  | GLU158 (B)                  | CD   | 3.35         |
| Qn         | C22  | GLU158 (B)                  | CG   | 3.84         |
| Qn         | C23  | THR155 (B)                  | CB   | 3.66         |
| Qn         | C23  | THR154 (B)                  | CG2  | 3.57         |
| Qn         | C22  | THR154 (B)                  | CG2  | 3.38         |
| Qn         | C17  | THR154 (B)                  | CG2  | 3.47         |
| Qn         | C16  | THR154 (B)                  | CG2  | 3.33         |
| Qn         | C27  | LEU151 (B)                  | CD2  | 3.82         |
| Qn         | C23  | LEU151 (B)                  | CD1  | 3.51         |
| Qn         | C27  | LEU151 (B)                  | CG   | 3.77         |
| Qn         | C23  | LEU151 (B)                  | CG   | 3.75         |
| Qn         | C20  | THR128 (B)                  | CG2  | 3.82         |
| Qn         | C14  | THR128 (B)                  | CG2  | 3.68         |
| Qn         | C10  | THR128 (B)                  | CG2  | 3.79         |
| Qn         | C18  | GLU158 (A)                  | CD   | 3.62         |
| Qn         | C12  | GLU158 (A)                  | CD   | 3.77         |
| Qn         | C9   | GLU158 (A)                  | CD   | 3.83         |
| Qn         | C19  | GLU158 (A)                  | CG   | 3.72         |
| Qn         | C18  | GLU158 (A)                  | CG   | 3.86         |
| Qn         | C19  | THR154 (A)                  | CG2  | 3.69         |
| Qn         | C13  | THR154 (A)                  | CG2  | 3.80         |
| Qn         | C18  | THR154 (A)                  | CG2  | 3.89         |
| Qn         | C13  | THR127 (A)                  | C    | 3.83         |
| Qn         | C18  | PHE75 (A)                   | CE1  | 3.75         |

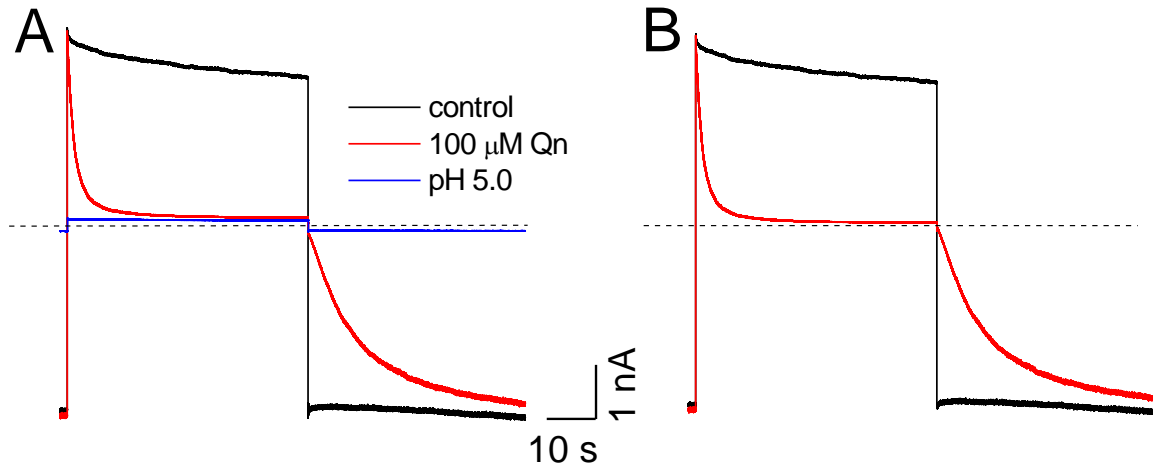

**Fig. S1.** Subtraction of endogenous/leak currents. (A) Uncorrected (raw) Kir4.1 current traces in control (black), 100  $\mu$ M Qn (red) and pH 5.0 (blue) conditions. (B) Kir4.1 currents in control (black) and 100  $\mu$ M Qn (red) conditions after the subtraction of endogenous/leak currents (blue trace en A).

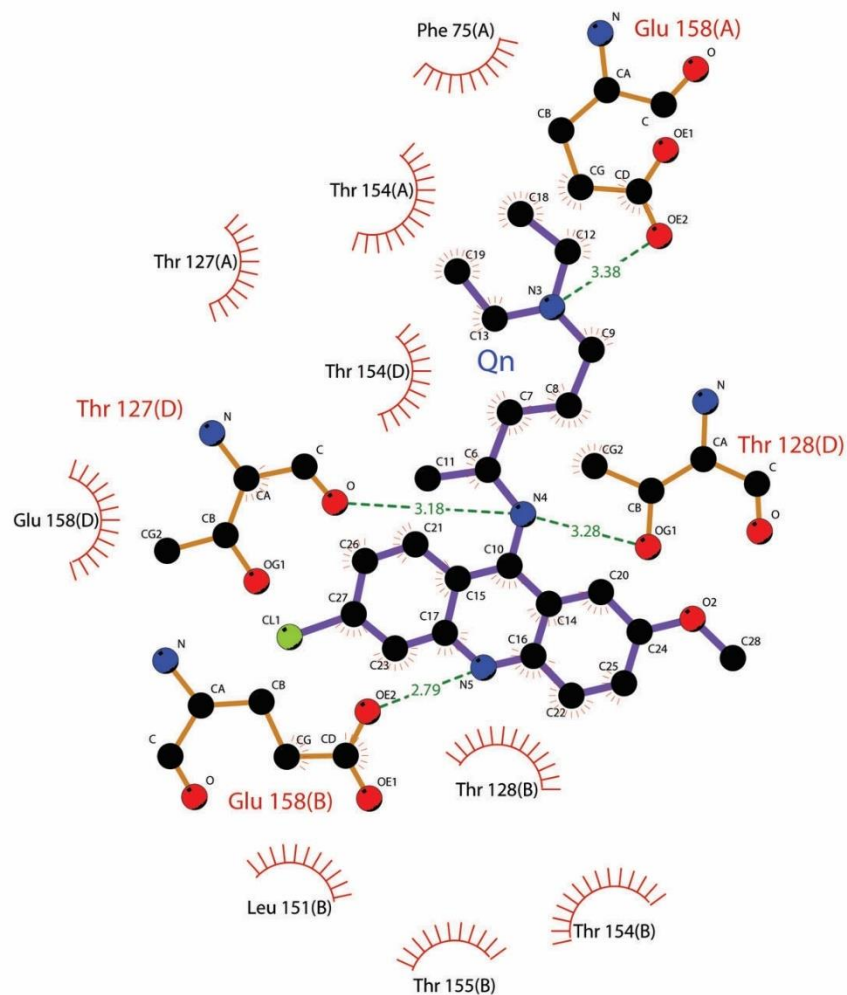

### Key

- |                              |                                                               |
|------------------------------|---------------------------------------------------------------|
| Ligand bond                  | His 53 Non-ligand residues involved in hydrophobic contact(s) |
| Non-ligand bond              | Corresponding atoms involved in hydrophobic contact(s)        |
| Hydrogen bond and its length |                                                               |

**Fig. S2.** Schematic depiction of the main interactions of Kir4.1 and quinacrine (Qn). This image was generated with LIGPLOT program. A distance between donor and acceptor of less than 3.5 Å is considered as a hydrogen-bond, and a 4.1 Å distance between two hydrophobic atoms is considered a hydrophobic interaction.

**A**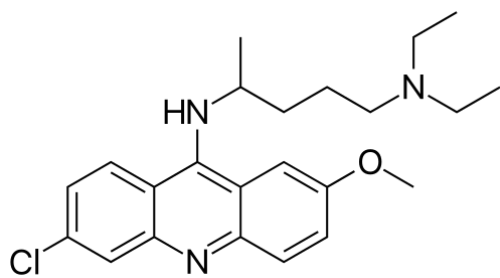**B**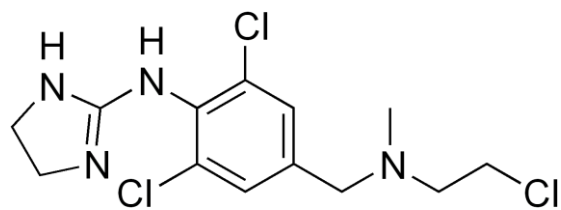

**Fig. S3.** Structures of quinacrine (A) and chloroethylclonidine (B).
